# Supplementary material for: Insulin-like growth factor II prevents oxidative and neuronal damage in cellular and mice models of Parkinson's disease
Source: PubMed Central journal article supplement — Redox Biol. 2021 Aug 8;46:102095. doi: 10.1016/j.redox.2021.102095 (PMC8379511; doi:10.1016/j.redox.2021.102095), 2021-08-08
Supplement: mmc1.pdf [file mmc1.pdf]

**Insulin-like growth factor II prevents oxidative and neuronal damage in cellular and mice models of Parkinson's disease**

Elisa Martín-Montañez, Nadia Valverde, David Ladrón de Guevara-Miranda, Estrella Lara, Yanina S. Romero-Zerbo, Carmelo Millón, Federica Boraldi, Fabiola Ávila-Gámiz, Ana M Pérez-Cano, Pablo Garrido-Gil, Jose Luis Labandeira-Garcia, Luis J Santin, Jose Pavia\*, María Garcia-Fernandez\*

\* Corresponding author: [igf@uma.es](mailto:igf@uma.es); [pavia@uma.es](mailto:pavia@uma.es)

**This word file includes:**

**Supplementary Fig. 1: Representative immunocytochemistry images and bright field of IGF-IIr in SN4741 dopaminergic neurons.**

**Supplementary Fig. 2: Major pathways of oxidative homeostasis, survival, and neuronal dopaminergic markers, with the parameters studied in bold.**

**Supplementary Fig. 3: Effects of AB on SN4741 dopaminergic cells.**

**Supplementary Fig. 4: Effects of LEU[27]-IGF-II on SN4741 dopaminergic cells against MPP<sup>+</sup>-induced toxicity.**

**Supplementary Fig. 5: Effect of LEU[27]-IGF-II on SN4741 dopaminergic cells.**

**Supplementary Fig. 6: Measurement of the striatal MPP<sup>+</sup> concentration.**

25

26 Supplementary Figure 1.

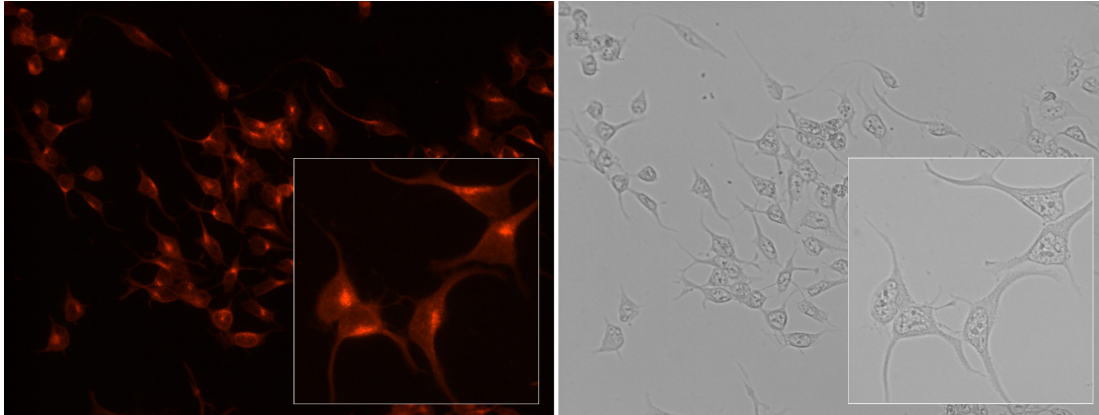

27

28

29 **Supplementary Fig. 1: Representative immunocytochemistry images and bright field and**  
30 **of IGF-IIr in SN4741 dopaminergic neurons.** Images were acquired using an Olympus BX51  
31 epifluorescence microscope at 40x magnification.

32

33

34

35

36

37

38

39

40 Supplementary Fig. 2:

41

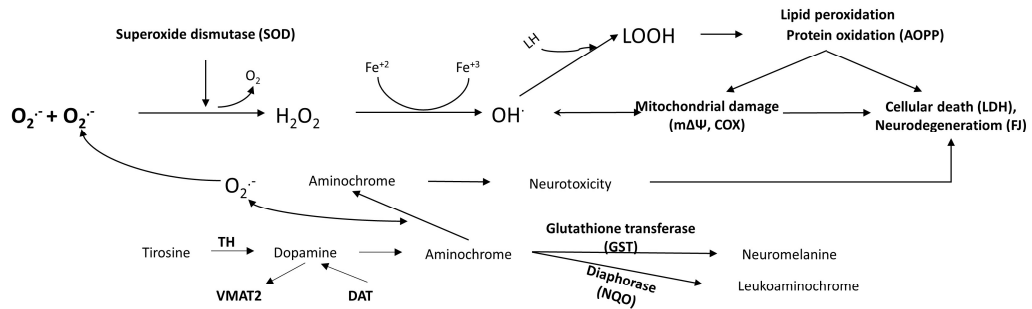

42

43

44 **Supplementary Fig. 2: Major pathways of oxidative homeostasis, survival, and neuronal**  
45 **dopaminergic markers, with the parameters studied in bold.**

46

47 Supplementary Fig. 3:

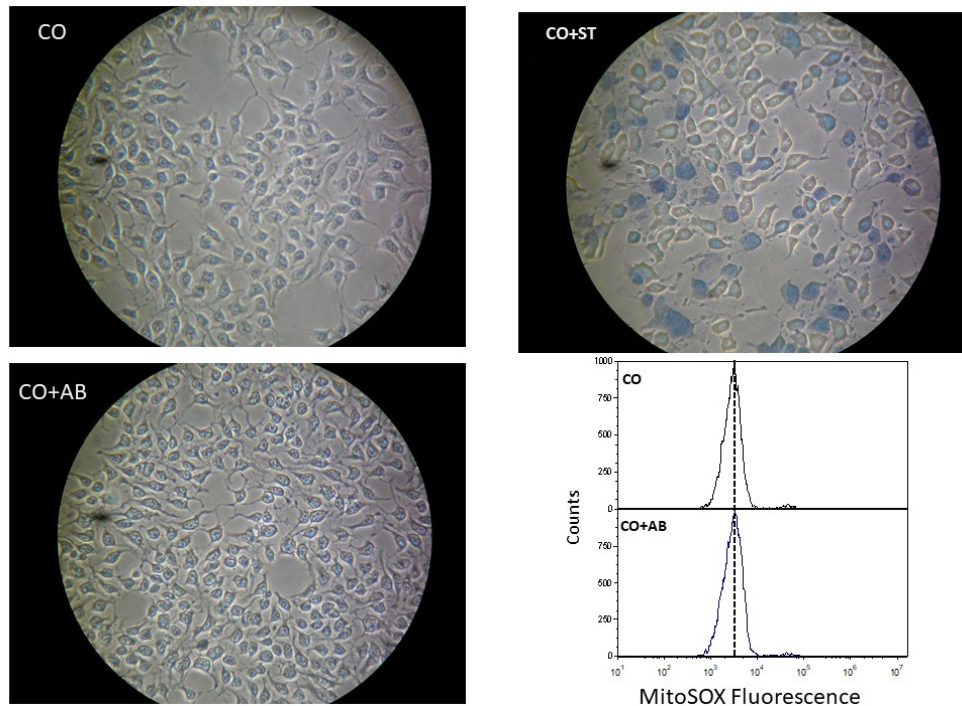

51 **Supplementary Fig. 3: Effects of AB on SN4741 dopaminergic cells.** Survival was measured  
52 using Trypan Blue stain after 6h of incubation of cells, at 37 °C, with Locke or AB (20ng/mL) or  
53 staurosporine (ST) 500nM. Images were acquired in an inverted microscope at 4X magnification.  
54 Redox production was assessed by MitoSOX probes and flow cytometry after incubation of cells  
55 for 2.5 h at 37°C with Locke or AB (20ng/mL).

56

57 Supplementary figure 4

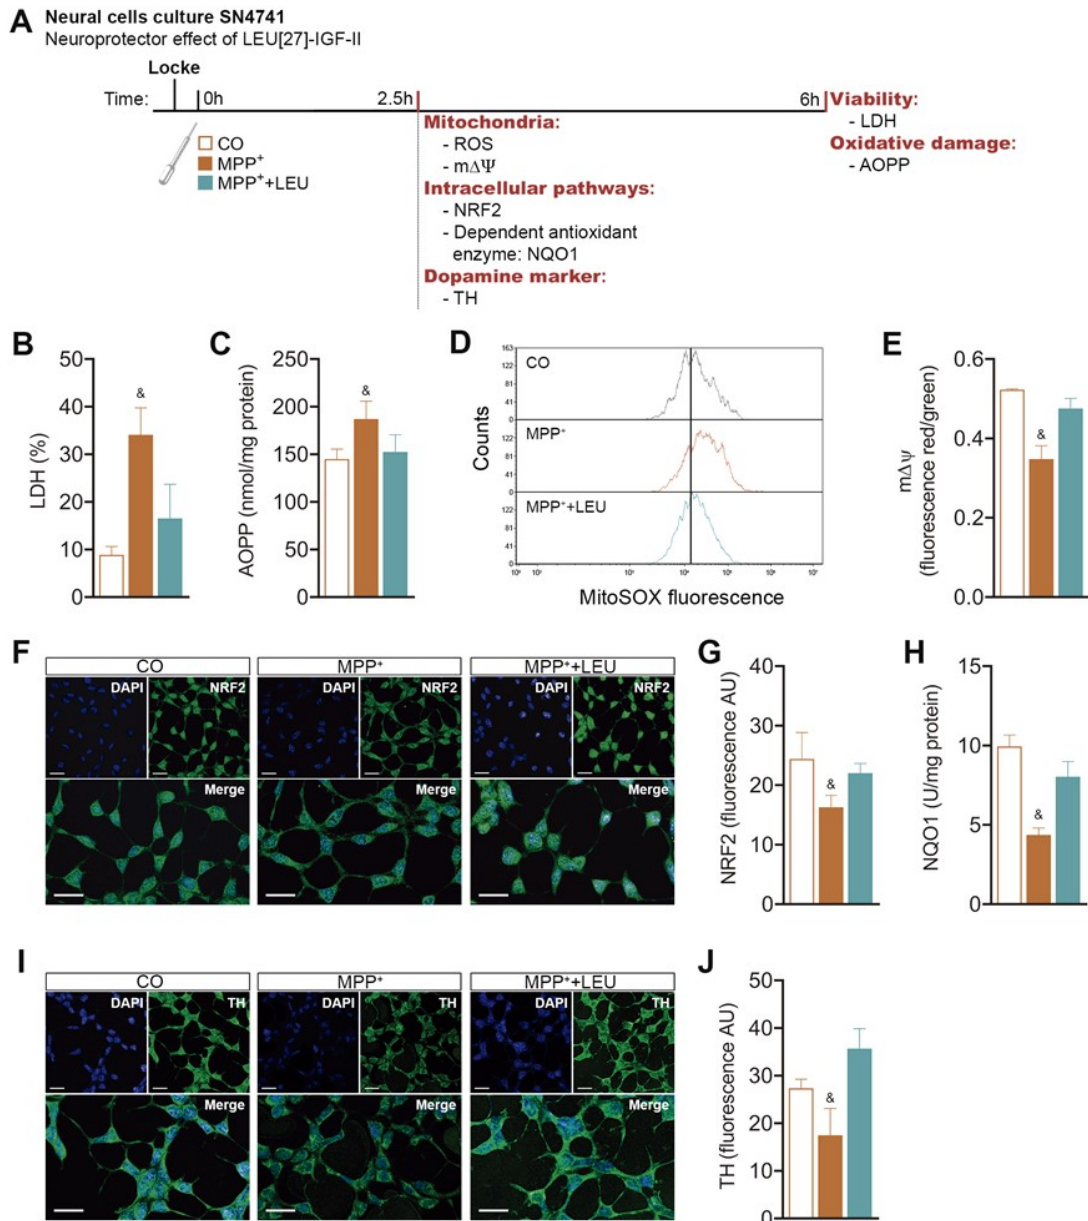

58

59

60 **Supplementary Fig. 4: Effects of LEU[27]-IGF-II on SN4741 dopaminergic cells against**  
 61 **MPP<sup>+</sup>-induced toxicity.** (A) Experimental design to assess the relevance of IGF-IIr in the main  
 62 action of IGF-II. The study was taken in SN4741 cells after 2.5 h or 6h, at 37°C, of incubation  
 63 with MPP<sup>+</sup>, in the presence or absence of LEU (10nM), an IGF-II analogue with high affinity for

64 IGF-IIr. **(B)** Cytotoxicity, measured by quantifying LDH release and expressed as % of control.  
65 **(C)** Oxidative damage was evaluated as Protein oxidation (AOPP). **(D)** Mitochondrial function  
66 was estimated using MitoSOX fluorescence as mitochondrial ROS production and **(E)**  
67 Mitochondrial  $m\Delta\Psi$  measured as JC1 fluorescence aggregates. **(F)** Intracellular signalling  
68 pathway was evaluated as immunocytochemistry stain for NRF2 and nuclear DAPI  
69 (Representative images), **(G)** Quantification of NRF2 immunofluorescence and **(H)** NRF2 target  
70 gene NQO1 activity. **(I)** Dopamine marker was assessed as immunocytochemistry stain for  
71 nuclear DAPI and TH (Representative images). **(J)** Quantification of TH immunofluorescence.  
72 Data are expressed as mean  $\pm$  SEM. n = 6 each group (3 independent experiment). & P< 0.05,  
73 versus all other groups. Data were analysed by one-way ANOVA followed by Tukey's multiple  
74 comparison test.

75

76

77

78 Supplementary figure 5

79

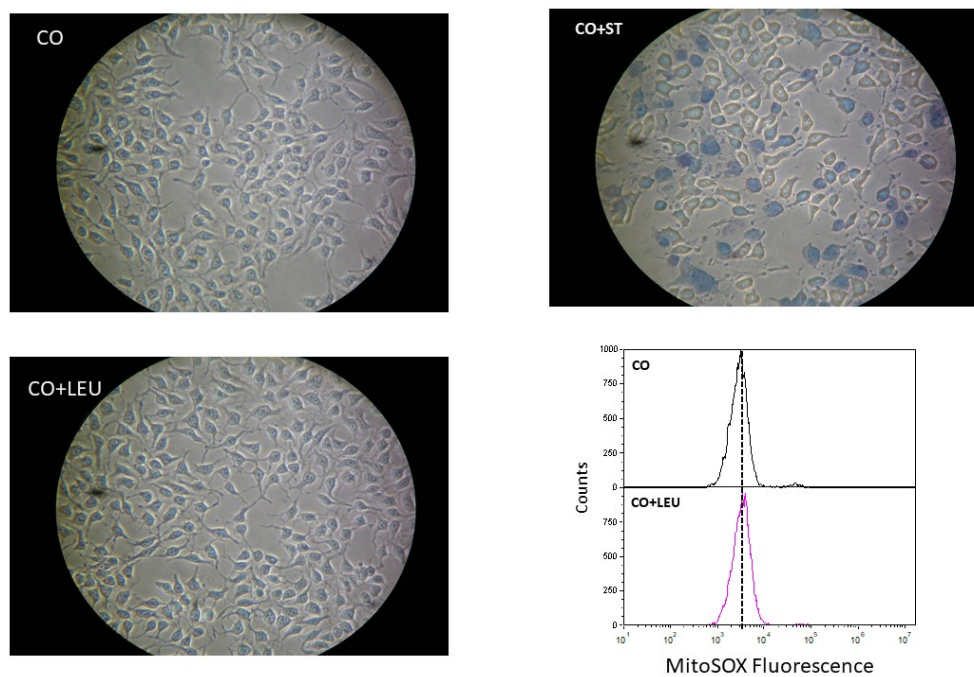

80

81

82 **Supplementary Fig. 5: Effect of LEU[27]-IGF-II on SN4741 dopaminergic cells.** Survival  
83 was measured using Trypan Blue stain after 6h at 37 °C of incubation with Locke or Leu (100  
84 ng/mL) or staurosporine (ST) 500nM. Images were acquired in an inverted microscope at 4X  
85 magnification. Redox production was assessed by MitoSOX probes and flow cytometry, after  
86 incubation of cells for 2.5 h at 37°C with Locke or Leu (10 nM).

87

88

89 Supplementary figure 6

90

91

92

93

94

95

96

97

98

99

100

101

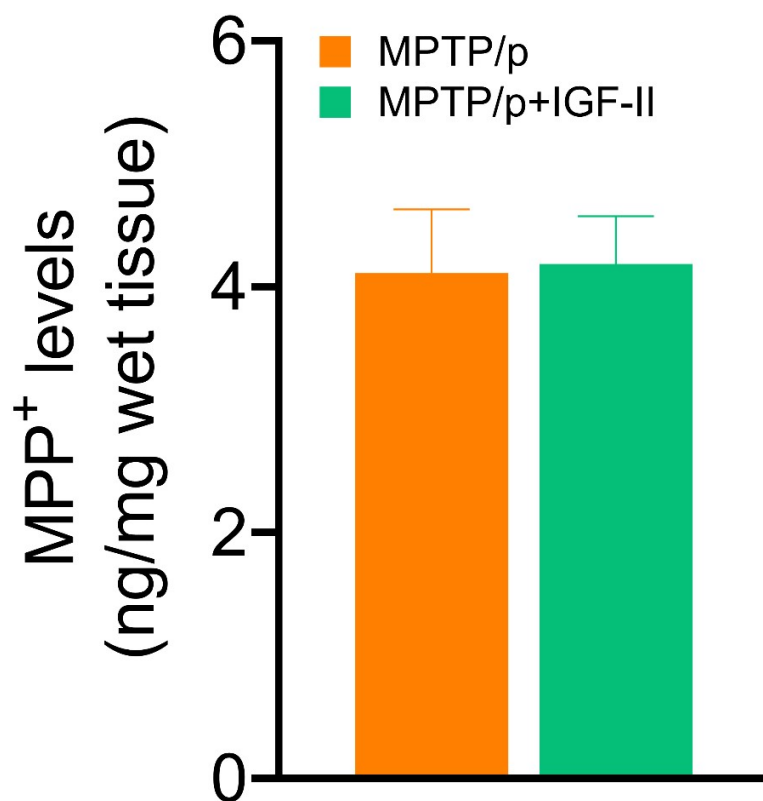

102 **Supplementary Fig. 6: Measurement of the striatal MPP<sup>+</sup> concentration.** Quantification was  
103 performed 2 h after the administration of MPTP/p, in the presence and absence of IGF-II. Data  
104 are expressed as mean  $\pm$  SEM and analysed by unpaired Student's t-test ( $P > 0.05$ ).

105

106
